# Supplementary material for: Peptides from the Intestinal Tract of Breast Milk-Fed Infants Have Antimicrobial and Bifidogenic Activity
Source: PubMed Central journal article supplement (PMC7956819; doi:10.3390/ijms22052377), 2021-02-27
Supplement: ijms-22-02377-s001.pdf [file ijms-22-02377-s001.pdf]

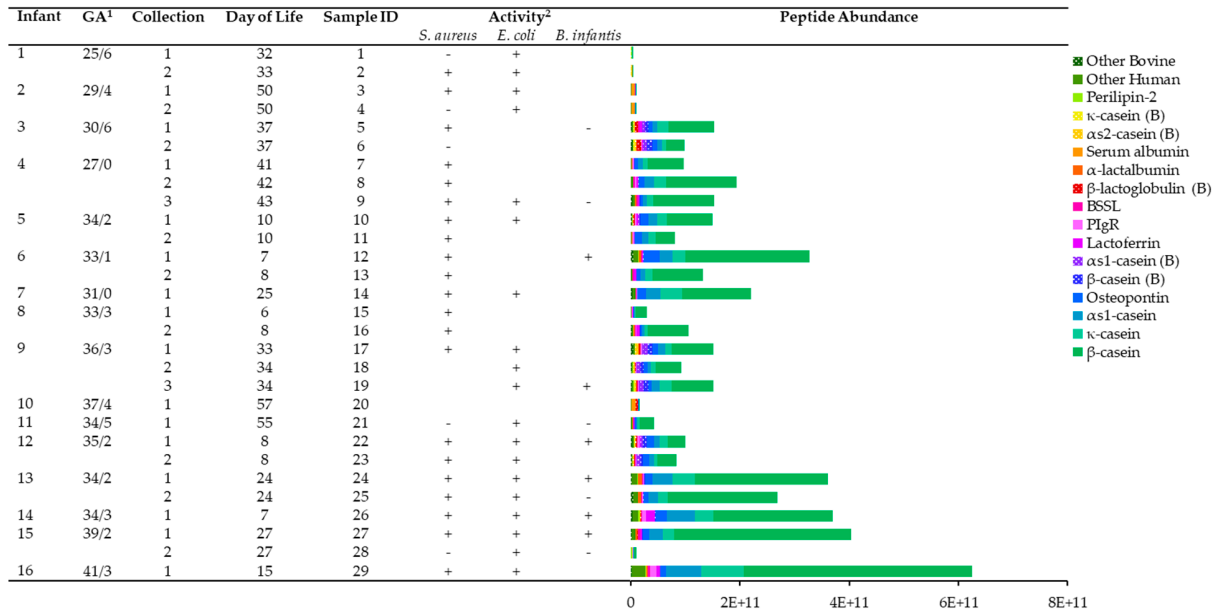

**Figure S1.** Infant birth information, screening activity, and total abundance of peptides from individual proteins for each intestinal peptide extract. Peptide abundances from each intestinal sample are sorted by protein from highest to lowest mean abundance. Bovine milk proteins are labeled with a (B) in the legend and are filled with a dotted pattern. PIgR, polymeric immunoglobulin receptor; BSSL, bile salt-stimulated lipase. <sup>1</sup> GA units are wk/day. <sup>2</sup> + Indicates the sample stimulated growth of the bacteria, - indicates the sample inhibited growth, and no symbol indicates the sample was inactive.

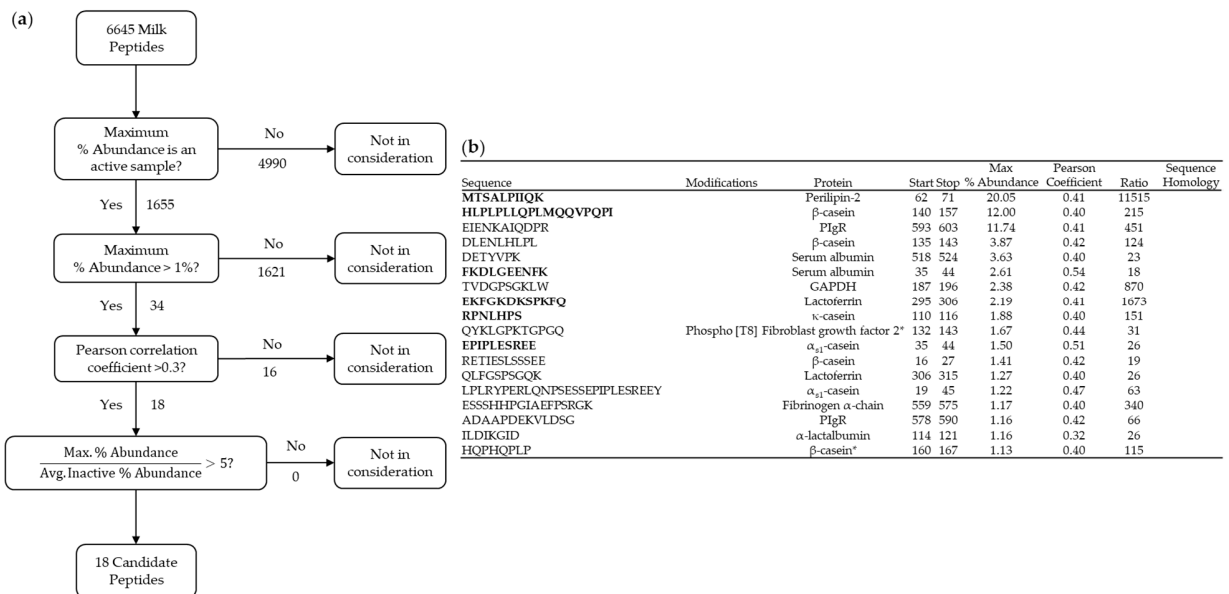

**Figure S2.** (a) Flow diagram of criteria and thresholds by which peptides with potential antimicrobial activity against *Staphylococcus aureus* were excluded from selection for activity testing. (b) List of peptides from which candidate peptides (in bold font) were selected for synthesis and activity testing.

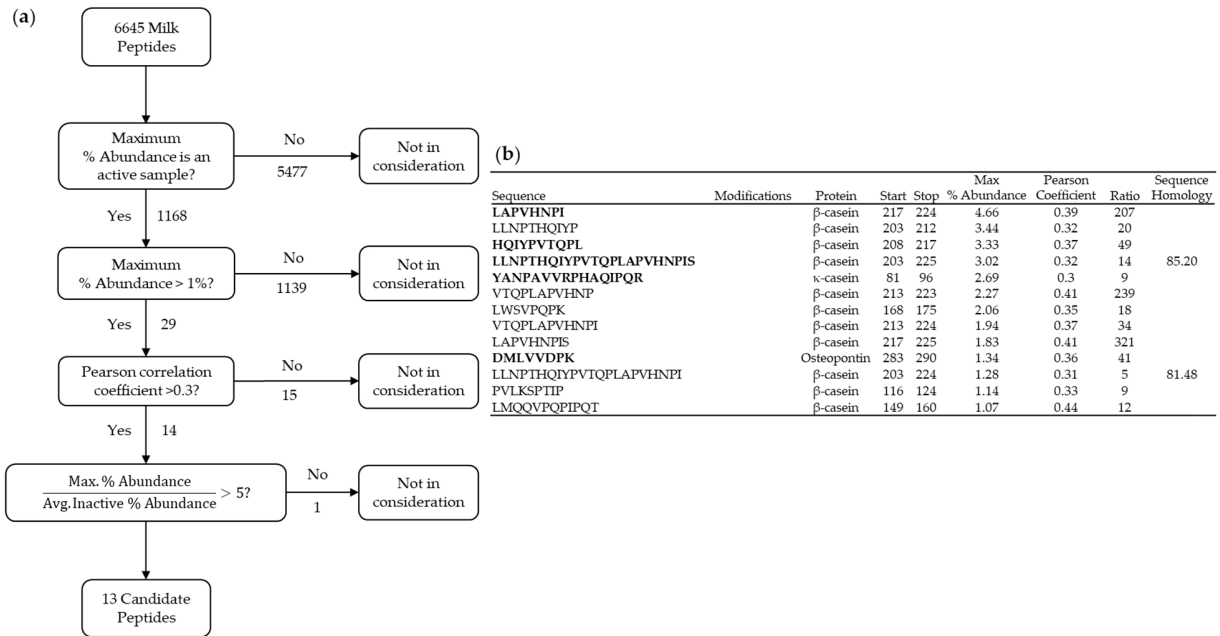

**Figure S3.** (a) Flow diagram of criteria and thresholds by which peptides with potential bifidogenic activity for *Bifidobacterium infantis* were excluded from selection for activity testing. (b) List of peptides from which candidate peptides (in bold font) were selected for synthesis and activity testing.

**Table S1.** List of known bioactive peptides in the infant intestinal samples.

| Peptide              | Species | Parent Protein         | Location  | Function       |
|----------------------|---------|------------------------|-----------|----------------|
| ENLHLPLP             | Both    | $\beta$ -casein        | (137–144) | ACE-inhibitory |
| NLHLPLP              | Both    | $\beta$ -casein        | (138–144) | ACE-inhibitory |
| ENLHLPLPLL           | Both    | $\beta$ -casein        | (146–155) | ACE-inhibitory |
| NLHLPLPLL            | Both    | $\beta$ -casein        | (147–155) | ACE-inhibitory |
| FFVAPFPEVFGK         | Bovine  | $\alpha_{s1}$ -casein  | (38–49)   | ACE-inhibitory |
| FVAPFPEVFG           | Bovine  | $\alpha_{s1}$ -casein  | (39–48)   | ACE-inhibitory |
| FPEVFGK              | Bovine  | $\alpha_{s1}$ -casein  | (43–49)   | ACE-inhibitory |
| IGSENSEKTTMP         | Bovine  | $\alpha_{s1}$ -casein  | (201–212) | ACE-inhibitory |
| ALNEINQFYQK          | Bovine  | $\alpha_{s2}$ -casein  | (96–106)  | ACE-inhibitory |
| AMKPWIQPK            | Bovine  | $\alpha_{s2}$ -casein  | (204–212) | ACE-inhibitory |
| LVYPPGPI             | Bovine  | $\beta$ -casein        | (73–81)   | ACE-inhibitory |
| MPFPKYVPEP           | Bovine  | $\beta$ -casein        | (124–133) | ACE-inhibitory |
| VENLHLPLPLL          | Bovine  | $\beta$ -casein        | (145–155) | ACE-inhibitory |
| LLYQEPVLGPPVRGPFPIIV | Bovine  | $\beta$ -casein        | (206–224) | ACE-inhibitory |
| QEPVLGPPVRGPFPIIV    | Bovine  | $\beta$ -casein        | (209–224) | ACE-inhibitory |
| EPVLGPPVRGPFPI       | Bovine  | $\beta$ -casein        | (210–221) | ACE-inhibitory |
| VLGPPVRGPFPI         | Bovine  | $\beta$ -casein        | (212–221) | ACE-inhibitory |
| LDIQKVAGTW           | Bovine  | $\beta$ -lactoglobulin | (28–37)   | ACE-inhibitory |
| DAQSAPLRVY           | Bovine  | $\beta$ -lactoglobulin | (49–58)   | ACE-inhibitory |
| FSDKIAK              | Bovine  | $\kappa$ -casein       | (39–45)   | ACE-inhibitory |
| HPHPHLSF             | Bovine  | $\kappa$ -casein       | (119–126) | ACE-inhibitory |
| DKIYPSFQPQPLIYP      | Human   | $\beta$ -casein        | (53–67)   | ACE-inhibitory |
| IYPSFQPQPLIYP        | Human   | $\beta$ -casein        | (55–67)   | ACE-inhibitory |
| FQPQPLIYP            | Human   | $\beta$ -casein        | (59–67)   | ACE-inhibitory |
| TVYTKGRVMP           | Human   | $\beta$ -casein        | (107–116) | ACE-inhibitory |
| LTDLENLHLPL          | Human   | $\beta$ -casein        | (133–142) | ACE-inhibitory |
| LENLHLPLP            | Human   | $\beta$ -casein        | (136–144) | ACE-inhibitory |
| YANPAVVRP            | Human   | $\kappa$ -casein       | (81–89)   | ACE-inhibitory |
| IKHQGLPQEV           | Bovine  | $\alpha_{s1}$ -casein  | (21–30)   | Antimicrobial  |
| LRLKKYKVPQL          | Bovine  | $\alpha_{s1}$ -casein  | (114–124) | Antimicrobial  |
| SDIPNPIGSENSEK       | Bovine  | $\alpha_{s1}$ -casein  | (195–208) | Antimicrobial  |
| TKKTKLTEEEKNRL       | Bovine  | $\alpha_{s2}$ -casein  | (163–176) | Antimicrobial  |
| IQPKTKVIPYVR         | Bovine  | $\alpha_{s2}$ -casein  | (209–220) | Antimicrobial  |
| TKVIPYVRYL           | Bovine  | $\alpha_{s2}$ -casein  | (213–222) | Antimicrobial  |
| TEDELQDKIHPF         | Bovine  | $\beta$ -casein        | (56–67)   | Antimicrobial  |
| PVVVPPFLQPE          | Bovine  | $\beta$ -casein        | (96–106)  | Antimicrobial  |
| VLPVPQKAVPYPQR       | Bovine  | $\beta$ -casein        | (185–198) | Antimicrobial  |
| YQEPVLGPPVRGPFPI     | Bovine  | $\beta$ -casein        | (206–220) | Antimicrobial  |
| GLDIQKVAGT           | Bovine  | $\beta$ -lactoglobulin | (27–36)   | Antimicrobial  |
| AASDISLLDAQSAPLR     | Bovine  | $\beta$ -lactoglobulin | (41–56)   | Antimicrobial  |

**Table S1 (cont.)**

| Peptide                     | Species | Parent Protein Location          | Function                                       |
|-----------------------------|---------|----------------------------------|------------------------------------------------|
| IIEKTKIPAVF                 | Bovine  | $\beta$ -lactoglobulin (89–100)  | Antimicrobial                                  |
| FSDKIAK                     | Bovine  | $\kappa$ -casein (39–45)         | Antimicrobial                                  |
| MAIPPKNQDKTEIPTINT          | Bovine  | $\kappa$ -casein (127–145)       | Antimicrobial                                  |
| LLNQELLLNPTHQIYPV           | Human   | $\beta$ -casein (197–213)        | Antimicrobial                                  |
| QELLLNPTHQIYPVTQPLAPVHNPISV | Human   | $\beta$ -casein (200–226)        | Antimicrobial                                  |
| QVVPYPQ                     | Human   | $\beta$ -casein (182–188)        | Antioxidant                                    |
| YLGYLEQLLR                  | Bovine  | $\alpha$ 1-casein (106–115)      | Anxiolytic                                     |
| ALKALPMHIR                  | Bovine  | $\beta$ -lactoglobulin (155–164) | Cell-proliferative                             |
| RETIESLSSESSEESITEYK        | Human   | $\beta$ -casein (16–33)          | Cell-proliferative                             |
| SPTIPFFDPQIPK               | Human   | $\beta$ -casein (120–132)        | Cell-proliferative                             |
| LIVTQTMK                    | Bovine  | $\beta$ -lactoglobulin (17–24)   | Cytotoxic                                      |
| LPQNIPPLT                   | Bovine  | $\beta$ -casein (85–93)          | DPP-IV-inhibitory                              |
| LKPTPEGDL                   | Bovine  | $\beta$ -lactoglobulin (62–70)   | DPP-IV-inhibitory                              |
| LKPTPEGDL                   | Bovine  | $\beta$ -lactoglobulin (62–71)   | DPP-IV-inhibitory                              |
| INNQFLPYPY                  | Bovine  | $\kappa$ -casein (72–81)         | DPP-IV-inhibitory                              |
| VYVEELKPTPEGDLEILLQK        | Bovine  | $\beta$ -lactoglobulin (57–76)   | Hypocholesterolemic                            |
| LYQEPVLGVPVRGPFPIIV         | Bovine  | $\beta$ -casein (207–224)        | Immunomodulatory                               |
| YVPFPGPI                    | Bovine  | $\beta$ -casein (74–81)          | PEP-inhibitory                                 |
| ALPMHIR                     | Bovine  | $\beta$ -lactoglobulin (158–164) | ACE-inhibitory<br>Cell-proliferative           |
| FALPQYLK                    | Bovine  | $\alpha$ 2-casein (189–196)      | ACE-inhibitory<br>Antioxidant                  |
| IQKVAGTW                    | Bovine  | $\beta$ -lactoglobulin (28–35)   | ACE-inhibitory<br>DPP-IV-inhibitory            |
| LKALPMH                     | Bovine  | $\beta$ -lactoglobulin (156–162) | ACE-inhibitory<br>DPP-IV-inhibitory            |
| PYVRYL                      | Bovine  | $\alpha$ 2-casein (217–222)      | ACE-inhibitory<br>Antimicrobial<br>Antioxidant |
| RELEELNVPGEIVESLSSESITR     | Bovine  | $\beta$ -casein (16–40)          | Caseinophosphopeptide<br>Immunomodulatory      |
| TPEVDDEALEK                 | Bovine  | $\beta$ -lactoglobulin (141–151) | Antimicrobial<br>DPP-IV-inhibitory             |
| VKEAMAPK                    | Bovine  | $\beta$ -casein (113–120)        | Antimicrobial<br>Antioxidant                   |
| VLVLDTDYK                   | Bovine  | $\beta$ -lactoglobulin (108–116) | Antimicrobial<br>DPP-IV-inhibitory             |
| YVPFPGPIP                   | Bovine  | $\beta$ -casein (74–83)          | ACE-inhibitory<br>Antioxidant                  |
| WSVPQPK                     | Human   | $\beta$ -casein (169–175)        | ACE-inhibitory<br>Antioxidant                  |

**Table S1 (cont.)**

| Peptide           | Species | Parent Protein Location      | Function                                                            |
|-------------------|---------|------------------------------|---------------------------------------------------------------------|
| YQEPVLGPVR        | Bovine  | $\beta$ -casein (208–217)    | ACE-inhibitory<br>Immunomodulatory                                  |
| YQEPVLGPVRGPFPIIV | Bovine  | $\beta$ -casein (208–224)    | ACE-inhibitory<br>Antimicrobial<br>Antithrombin<br>Immunomodulatory |
| YQKFPQY           | Bovine  | $\alpha$ s2-casein (105–111) | ACE-inhibitory<br>Antioxidant                                       |
